# Supplementary material
Source: HighWire-hosted journal article supplement (https://bmjopen.bmj.com/content/7/9/e015481)
Supplement: inline-supplementary-material-2 [file inline-supplementary-material-2.pdf]

### Supplementary Information

#### Quality Assessment

##### (a) Observational Studies

| <b>Authors (year)</b>                         | <b>Did the study address a clearly focused issue?<br/>Was this the outcome of interest to this review?</b> | <b>Was the cohort recruited in an acceptable way?</b> | <b>Was the exposure accurately measured to minimise bias?</b> | <b>Was the outcome accurately measured to minimise bias?</b> | <b>Confounding factors?</b> | <b>Follow-up of subjects complete enough and long enough?</b> | <b>Overall Rating using Cochrane risk of bias scale (low/unclear/high)</b> |
|-----------------------------------------------|------------------------------------------------------------------------------------------------------------|-------------------------------------------------------|---------------------------------------------------------------|--------------------------------------------------------------|-----------------------------|---------------------------------------------------------------|----------------------------------------------------------------------------|
| <b>Chalder et al (2002)</b>                   | Yes, No.                                                                                                   | Yes                                                   | Yes                                                           | Yes                                                          | Can't tell                  | Can't tell, yes                                               | Unclear                                                                    |
| <b>Diaz-Caneja et al (2007)</b>               | Can't tell, No                                                                                             | Can't tell                                            | Can't tell                                                    | Can't tell                                                   | Yes                         | Yes, no                                                       | High                                                                       |
| <b>Lloyd et al (2012); Rimes et al (2014)</b> | Yes, No                                                                                                    | Yes                                                   | Yes                                                           | Yes                                                          | Can't tell                  | Can't tell, yes                                               | Unclear                                                                    |
| <b>Rimes et al(2007)</b>                      | Yes, No                                                                                                    | Yes                                                   | Yes                                                           | Yes                                                          | Can't tell                  | Can't tell, yes                                               | Unclear                                                                    |
| <b>Van de Putte et al (2007)</b>              | Yes, No                                                                                                    | Yes                                                   | Yes                                                           | Yes                                                          | Can't tell                  | Can't tell, yes                                               | Unclear                                                                    |

##### (b) Randomised controlled trials

| <b>Authors (year)</b>                           | <b>Did the trial address a clearly focused issue?<br/>Was this the outcome of interest to this review?</b> | <b>Was the assignment of patients to treatments randomised?</b> | <b>Were patients, healthcare professionals and research staff blinded?</b> | <b>Were the groups similar at the start of the trial?</b> | <b>Aside from the experimental investigation, were the groups treated equally?</b> | <b>Were all of the patients who entered the trial properly accounted for at its conclusion?</b> | <b>Overall Rating using Cochrane risk of bias scale (low/unclear/high)</b> |
|-------------------------------------------------|------------------------------------------------------------------------------------------------------------|-----------------------------------------------------------------|----------------------------------------------------------------------------|-----------------------------------------------------------|------------------------------------------------------------------------------------|-------------------------------------------------------------------------------------------------|----------------------------------------------------------------------------|
| <b>Nijhof et al (2012); Nijhof et al (2013)</b> | Yes, no                                                                                                    | Yes                                                             | No                                                                         | Yes                                                       | Yes                                                                                | Can't tell                                                                                      | Low                                                                        |
| <b>Rowe (1997)</b>                              | Yes, no                                                                                                    | Yes                                                             | Yes                                                                        | Yes                                                       | Yes                                                                                | Yes                                                                                             | Low                                                                        |
| <b>Wright et al (2005)</b>                      | Yes. no                                                                                                    | Yes                                                             | No                                                                         | Yes                                                       | Yes                                                                                | Can't tell                                                                                      | Low                                                                        |
